# Supplementary material for: Interocular conflict from a monocular augmented reality display: Impact of visual characteristics on performance
Source: PLoS One. 2021 Sep 2;16(9):e0256766. doi: 10.1371/journal.pone.0256766 (PMC8412327; doi:10.1371/journal.pone.0256766)
Supplement: S1 Data — (XLSX) [file pone.0256766.s001.xlsx]

## Sheet: Feuil1
	Right eye																Left eye
	HSF-100%				LSF-100%				LSF-60%				LSF-20%				HSF-100%				LSF-100%				LSF-60%				LSF-20%
	Cont 1		Cont 0.6		Cont 1		Cont 0.6		Cont 1		Cont 0.6		Cont 1		Cont 0.6		Cont 1		Cont 0.6		Cont 1		Cont 0.6		Cont 1		Cont 0.6		Cont 1		Cont 0.6
	With pulsing	Without pulsing	With pulsing	Without pulsing	With pulsing	Without pulsing	With pulsing	Without pulsing	With pulsing	Without pulsing	With pulsing	Without pulsing	With pulsing	Without pulsing	With pulsing	Without pulsing	With pulsing	Without pulsing	With pulsing	Without pulsing	With pulsing	Without pulsing	With pulsing	Without pulsing	With pulsing	Without pulsing	With pulsing	Without pulsing	With pulsing	Without pulsing	With pulsing	Without pulsing
S01	8.58502	7.45638	8.10896	7.75215	9.61422	9.09098	7.88032	8.181	9.01142	8.88257	10.5113	8.37788	10.8305	9.7231	9.06229	11.3694	7.92435	7.6879	8.84467	7.90936	9.82024	8.35582	9.50902	8.66068	8.33146	8.4402	9.14044	7.73621	8.88987	8.53115	10.4378	9.56997
S02	8.19338	8.39229	9.63719	9.89018	7.51096	8.74046	7.98169	9.33193	8.85257	7.62626	7.74547	7.73953	9.5071	8.11746	7.88864	7.5292	7.92681	7.98732	7.99068	7.69541	8.32925	7.8754	7.24966	7.92685	7.62429	8.46401	8.35509	8.14313	8.4952	8.20493	8.68953	8.85697
S03	10.1272	10.7784	10.2383	9.30327	13.7254	9.28701	11.4106	9.23653	11.3784	11.2874	11.0961	12.5451	10.9715	12.7532	12.1421	12.6674	12.291	9.4201	10.5902	9.80916	12.6081	9.21604	11.2012	11.0533	9.14037	12.5229	9.96381	11.5013	11.7475	12.2904	11.5849	10.7928
S04	8.54559	9.12694	8.46258	9.85987	8.60751	9.84017	8.34273	8.54633	9.63683	9.69782	8.66318	9.17912	9.49897	10.8387	9.64247	8.93299	8.46984	8.44829	7.4125	8.96157	9.34408	8.65759	8.46981	8.685	8.51467	9.72961	8.35716	9.20906	10.6798	8.36321	8.86818	9.42139
S05	12.858	10.8047	14.0564	12.1179	13.1644	15.6065	11.8336	14.7357	15.9784	14.3268	13.997	14.5955	13.3831	12.865	14.0776	11.7968	12.8345	12.7569	13.0403	11.0598	13.2091	12.2813	11.5637	12.0274	10.9937	13.099	13.1816	12.7088	13.6552	14.8121	15.5328	14.1766
S06	8.31734	9.4045	11.6247	9.64565	12.0551	8.01902	8.78246	10.051	11.247	11.7558	9.87563	8.64598	12.1407	9.20688	11.4152	9.4323	8.73985	10.1214	9.93382	10.2255	11.1102	9.79985	10.1239	10.8883	8.46867	8.72926	8.326	8.69285	8.5223	10.9982	8.95707	8.4488
S07	10.94	9.71355	10.7572	11.4194	11.3549	10.439	10.087	9.8379	11.5781	9.60002	9.65265	9.40161	9.84156	9.04268	7.98738	9.42389	10.0233	8.69077	9.37362	10.0704	11.4092	10.3327	8.58426	8.77949	10.9593	9.14145	10.2123	10.0838	9.22418	10.7115	8.85015	12.1241
S08	8.06446	7.03402	9.04021	8.48561	9.0366	7.07611	7.55527	6.94774	7.26315	7.78916	8.26477	7.75687	7.62688	8.95658	7.8739	8.15558	7.78516	8.10865	7.62438	6.95256	8.65427	7.48069	8.50628	7.66366	8.31771	7.98888	8.5967	8.33148	9.15116	8.98407	7.3919	8.12363
S09	10.5729	11.9223	9.96611	8.9477	10.0811	12.3228	9.61831	10.5447	11.9926	9.55925	10.3025	9.62463	10.6176	14.1617	10.5863	11.1088	9.36052	8.22469	9.27256	8.17092	8.48832	9.21067	9.61831	8.66456	10.339	9.11327	10.7378	10.3402	8.64004	10.9288	9.92448	10.7148
S10	14.6679	14.2935	15.164	13.9216	17.7853	18.8513	13.9354	22.569	12.8889	17.329	15.6031	14.7644	19.3008	19.8509	16.9964	14.1567	15.6457	15.8934	15.8167	15.3534	17.2555	19.4984	16.4729	15.9905	16.8285	15.7973	18.2822	16.0064	22.0289	17.2851	14.6103	15.8934
S11	10.5039	10.6044	12.804	12.2879	11.9821	11.5047	10.8109	11.6183	10.9063	10.9872	10.8784	14.7045	12.8267	11.2956	11.7894		12.5646	10.9666	11.2847	9.68971	17.4868	12.4721	13.037	12.2623	12.974	13.128	13.9411	10.434	12.4804	11.4224	13.9737	10.9706
S12	9.66369	9.40498	9.00914	8.78903	11.1573	8.95192	10.0825	10.7861	9.98949	10.4469	9.77271	11.0886	10.401	10.3484	11.0098	11.0975	9.28041	9.2082	8.51221	10.1215	9.85336	10.0042	10.0217	9.79026	10.2482	9.89608	10.5675	9.60402	9.65476	10.0126	11.1491	9.54685
S13	13.7896	11.1182	11.9156	13.3651	15.9137	14.4224	18.1058	15.8703	17.729	13.0476	14.6756	14.7761	14.4712	13.3414	18.4114	12.9629	13.7254	13.5763	14.1379	14.2652	16.4529	18.7816	15.9035	14.7424	15.8672	14.7145	15.5378	14.8931	15.6932	17.601	17.2253	15.4157
S14	9.4579	8.40824	9.08535	10.4864	7.69994	10.844	9.84123	9.55348	10.15	9.57024	9.5497	10.7787	11.0395	11.3503	12.0974	11.9704	9.33184	9.41405	9.77923	9.19976	8.88026	9.8257	10.4367	10.7494	10.2638	10.2743	8.75162	8.77191	10.6763	10.6401	10.8147	9.16341
S15	11.8881	11.8552	11.4477	13.245	12.9372	12.0124	12.6131	13.2665	11.4163	13.3285	14.0526	12.8905	12.2627	12.8784	13.2377	11.7798	11.7648	11.199	11.3134	11.5015	11.8831	11.5851	10.9578	12.6396	11.8479	11.8192	12.9031	10.6745	13.8364	12.0347	12.9033	12.0572
S16	10.6657	11.6463	9.00155	10.8438	10.307	10.4909	8.81441	8.52152	10.0824	8.87611	10.1025	8.79091	13.5384	12.744	9.96755	9.733	7.80017	9.14174	11.5625	7.36205	9.66519	11.0664	11.6142	12.6835	12.1404	10.4321	8.9349	10.5226	13.4797	9.13045	9.34108	10.5901
S17	14.0904	13.3548	11.0727	11.9451	10.9379	11.938	12.2647	11.0156	13.2678	11.299	12.5012	14.0611	12.6569	13.4185	15.015	12.1802	9.82793	11.4584	11.7088	10.8959	11.3936	11.1877	14.7942	13.6673	10.3968	12.2148	14.2981	11.1152	13.8878	14.1617	12.2532	12.1193
S18	8.80634	8.39313	9.17924	7.39583	8.54884	7.18046	7.85638	7.85092	8.16566	7.06654	7.47345	8.44102	9.31319	7.0315	8.2761	9.43993	9.62023	10.6576	7.86397	11.1796	10.6215	9.48662	10.8805	10.3422	8.81847	8.32617	12.6244	10.3491	7.59067	13.9726	8.98777	9.63624
